# Supplementary material for: Absolute and Relative Reliability of the Timed ‘Up & Go’ Test and ‘30second Chair-Stand’ Test in Hospitalised Patients with Stroke
Source: PLoS One. 2016 Oct 31;11(10):e0165663. doi: 10.1371/journal.pone.0165663 (PMC5087865; doi:10.1371/journal.pone.0165663)
Supplement: S1 Dataset — (XLS) [file pone.0165663.s001.xls]

## Sheet: Datasheet
Identification nummer	Timed 'Up & Go'-test (1=inclusion, 2=exclusion)	30 second chair stand test (1=inclusion, 2=exclusion)	Gender (1=male, 2=female)	Age (years)	Diagnosis (1=ischaemic, 2=haemorrgagic, 3= clinically comfirmed)	Hemiparetic side (1=left, 2=right, 3=no paratic symptoms)	Clinically observed problems with balance (1=yes, 2=no)	Days post stroke	New Mobility Score (range 0-9)	Assistive device on the testday (1=none, 3=stick, 5=rollator)	Measurement sequence of raters (1=Rater 1, 2=Rater 2)	Timed 'Up & Go'-test (seconds), Rater 1, trial 1 (first test session)	Timed 'Up & Go'-test (seconds), Rater 1, trial 2 (first test session)	Timed 'Up & Go'-test (seconds), Rater 1, trial 3 (first test session)	Timed 'Up & Go'-test (seconds) Rater 1, best trial (first test session)	Timed 'Up & Go'-test (seconds), Rater 2, trial 1 (first test session)	Timed 'Up & Go'-test (seconds), Rater 2, trial 2 (first test session)	Timed 'Up & Go'-test (seconds), Rater 2, trial 3 (first test session)	Timed 'Up & Go'-test (seconds), Rater 2, best trial (first test session)	Timed 'Up & Go'-test (seconds), Rater 1, trial 1 (second test session)	Timed 'Up & Go'-test (seconds), Rater 1, trial 2 (second test session)	Timed 'Up & Go'-test (seconds), Rater 1, trial 3 (second test session)	Timed 'Up & Go'-test (seconds), Rater 1, best trial (second test session)	Timed 'Up & Go'-test (seconds), Rater 2, trial 1 (second test session)	Timed 'Up & Go'-test (seconds), Rater 2, trial 2 (second test session)	Timed 'Up & Go'-test, Rater 2, trial 3 (second test session)	Timed 'Up & Go'-test, Rater 2, best trial (second test session)	30second chair stand test (1=use of armrest, 2= with out use of armrest)	30second chair stand test (repetitions), Rater 1 (first test session)	30second chair stand test (repetitions), Rater 2 (first test session)	30second chair stand test (repetitions), Rater 1 (second test session)	30second chair stand test (repetitions), Rater 2 (second test session)
8	1	1	1	59	1	2	1	8	9	5	2	17.97	17.41	18.22	17.41	19.09	18.13	18.1	18.1	17.79	18.59	17.57	17.57	18.69	22.69	19.22	18.69	1	7	8	6	7
9	1	2	1	91	1	2	1	7	3	5	2	25.43	26.41	24.5	24.5	22.72	26.1	22.9	22.72	28.63	26.78	25.28	25.28	24.68	25.82	24.56	24.56
20	1	1	2	79	1	1	1	5	9	5	1	16.31	17.07	15.22	15.22	15.35	15.31	15.02	15.02	15.1	14.66	13.22	13.22	15.88	13.78	13.16	13.16	2	6	5	4	4
31	1	1	2	80	1	2	1	3	3	5	2	18.37	18.41	19.44	18.37	21.06	19.44	20.78	19.44	22.34	20.66	21	20.66	19.13	18.4	19.85	18.4	1	4	4	4	4
33	1	1	1	84	1	2	1	4	3	5	1	22.84	22.37	23.19	22.37	21.62	22	23.68	21.62	22.72	27.71	22.97	22.72	22.75	23.9	21.78	21.78	2	6	4	3	5
21	1	1	2	80	1	1	1	7	9	5	1	29.66	21.75	21.94	21.75	22.03	22.81	21.9	21.9	20.1	17.5	17.19	17.19	18.97	17.97	15.56	15.56	2	6	7	7	7
36	1	1	2	88	1	2	1	6	7	3	1	11.34	11.09	10	10	11.03	10.41	9.88	9.88	9.97	10.85	10.09	9.97	10.78	9.72	10.47	9.72	2	8	9	10	11
29	1	1	1	81	1	2	1	6	9	5	2	15.28	12.75	12.97	12.75	13.57	14.71	14.5	13.57	13.72	11.81	12.69	11.81	11	10.79	12.13	10.79	1	9	8	7	8
42	1	1	2	78	1	1	1	5	9	5	2	15.53	15.5	16.06	15.5	21.25	15.81	16.13	15.81	17.31	15.97	16.69	15.97	15.16	14.78	15.44	14.78	2	8	8	8	8
23	1	1	1	85	1	2	1	10	6	5	1	15.97	16	15.6	15.6	15.22	14.75	12.69	12.69	13.75	13.34	13.69	13.34	14.28	13.47	13.19	13.19	1	11	9	12	9
44	1	1	1	56	1	2	1	4	9	1	1	9.5	8.9	9.06	8.9	9.22	8.84	9.07	8.84	9.81	9.41	8.6	8.6	9.62	9.03	8.72	8.72	2	9	10	10	10
45	1	1	2	91	1	1	1	3	6	5	2	17.56	17.22	15.84	15.84	20.07	19.16	19.07	19.07	17.78	17.47	18.25	17.47	16.66	16.9	17.79	16.66	2	8	7	6	7
80	1	1	2	80	1	3	1	2	6	5	1	17.41	18.25	16.12	16.12	18.13	13.66	13.94	13.66	12.5	13.37	12.53	12.5	14.84	12.12	12.22	12.12	2	6	9	10	9
86	1	1	2	89	1	3	1	3	9	1	1	13.31	12.5	11.94	11.94	12.37	11.72	11.13	11.13	11.22	11.62	10.96	10.96	12.06	18.06	11.82	11.82	2	9	10	9	10
87	1	1	1	81	1	1	2	3	9	1	2	14.94	13.06	13.15	13.06	15.34	15.72	15	15	13.54	14.71	14.4	13.54	13.19	13.16	13.37	13.16	2	6	5	6	5
89	1	1	1	76	1	1	1	2	9	3	2	11.59	12.72	11.37	11.37	11.05	13.03	12.69	11.05	10.81	10.75	11.13	10.75	8.88	9.78	9.28	8.88	2	6	6	8	8
82	1	1	1	65	1	1	1	7	9	5	2	14.37	13.84	14.28	13.84	15.47	14.22	14.82	14.22	13.88	12.82	12.25	12.25	14.55	13.78	13.97	13.78	2	12	9	11	9
90	1	1	1	88	1	1	1	5	9	1	1	10.44	11.19	9.94	9.94	9.94	9.38	10.1	9.38	9.78	9.69	9.94	9.69	9.47	9.5	9.34	9.34	2	6	5	7	6
97	2	1	1	77	1	1	1	6	9	5	2																	2	12	11	12	12
116	1	1	1	58	1	3	1	5	9	1	1	21.93	18.87	19.35	18.87	18.25	17.72	16.22	16.22	19.96	16.84	17.94	16.84	18.75	18.34	20.65	18.34	1	6	5	5	4
117	1	1	1	67	1	1	1	3	9	5	1	17.94	17.62	16.59	16.59	15.43	16.09	16.5	15.43	18.22	19.82	17.88	17.88	17.75	17.31	16.59	16.59	2	9	10	9	10
126	1	1	1	68	1	2	1	4	6	5	2	23.03	24.5	29.81	23.03	24.13	24.37	25.25	24.13	20.28	23.25	21.68	20.28	18.37	19.97	18.5	18.37	2	5	4	6	5
128	1	1	2	43	1	1	1	5	9	1	1	6.69	69.78	8	6.69	6.34	7.72	6.44	6.34	6.5	6.57	7.12	6.5	6.53	7	6.68	6.53	2	12	14	16	16
133	1	1	1	81	1	2	1	3	9	5	2	14.22	13.82	13.34	13.34	14.37	13.75	14.12	13.75	14.38	13.82	13.66	13.66	12.34	12.31	12.13	12.13	2	7	6	8	9
93	1	1	1	67	1	2	1	23	9	5	1	29.35	27.75	30.53	27.75	24.66	25.41	24.53	24.53	27.88	28.5	26.25	26.25	25.43	26.85	25.54	25.43	2	7	8	8	8
132	1	1	1	56	1	2	1	4	9	5	2	20.91	19.35	18.75	18.75	18.59	19.63	17.62	17.62	19.75	18.87	18.25	18.25	17.15	17.81	19.19	17.15	2	3	3	4	3
129	1	1	2	71	1	3	1	2	4	5	1	22.46	20.97	22.6	20.97	19.65	22.09	20.78	19.65	19.97	19.88	19.25	19.25	19.44	20.34	20.9	20.34	1	3	6	4	2
136	1	1	1	77	1	1	2	4	9	1	2	10.4	9.15	9.19	9.15	9.57	8.5	9.75	8.5	10.68	10.58	9.97	9.97	10.13	9.97	10.31	9.97	2	10	10	10	9
143	1	1	2	75	1	3	2	6	9	1	1	9.6	9.31	9.53	9.31	7.22	8.16	7.97	7.22	8.12	8.4	8.13	8.12	8.03	7.31	7.44	7.31	2	12	13	13	12
149	1	1	1	62	2	1	2	3	9	1	2	7.97	7.5	7.53	7.5	8.44	8.6	7.87	7.87	8.72	8.53	8.22	8.22	8.44	8.44	7.72	7.72	2	11	9	11	11
170	1	1	1	85	1	1	1	2	6	5	1	16.6	15.88	16.85	15.88	16.19	14.72	17.25	14.72	19.94	20.06	18.59	18.59	20.37	19.97	18.18	18.18	2	9	10	9	10
181	1	1	2	76	1	2	1	5	9	5	2	19.12	17.65	17.41	17.41	22.44	19.85	18.72	18.72	20.69	18.31	16.9	16.9	18.62	17	18.56	17	2	4	4	3	2
171	1	1	1	44	2	3	1	9	9	5	2	14.13	13.44	12.12	12.12	14.53	14.34	13.46	13.46	12.63	12.29	11.63	11.63	12.97	12	12.16	12	2	9	8	11	10
130	1	1	1	51	2	2	1	37	9	3	1	21.84	24.59	24.75	21.84	21.68	21.13	25.22	21.13	18.93	26.16	24.19	18.93	21.4	20.06	21.88	20.06	1	5	6	6	6
190	1	1	1	68	1	1	1	3	6	5	2	49.5	45.72	41.29	41.29	56.58	47.31	52.85	47.31	60.16	46.32	38.72	38.72	51.37	49.22	39.56	39.56	1	5	4	5	4
191	1	1	2	82	3	3	1	2	6	3	1	14.22	12.47	13.38	12.47	11.58	13.31	12.12	11.58	12.25	12.96	12.91	12.25	11.94	13.4	13.06	11.94	2	8	9	8	9
193	1	1	1	43	1	1	1	7	9	5	2	13.5	13.12	12.38	12.38	17.03	16.59	14.82	14.82	15.16	13.84	12.97	12.97	13.34	15.19	13.91	13.34	2	10	8	10	11
192	1	1	1	68	1	3	1	5	9	5	1	14.9	12.75	12.72	12.72	12.34	11.84	11.28	11.28	12	11.69	11.9	11.69	11.59	12.34	12.22	11.59	2	8	9	8	8
184	1	1	2	70	1	1	1	9	9	5	2	15.18	16.34	15.56	15.18	15.22	15.21	16.93	15.21	20.19	18.35	19.44	18.35	15.88	16.84	15.53	15.53	2	6	5	3	3
194	1	1	1	40	1	1	2	2	9	1	2	12.9	12.47	12.84	12.47	13	12.69	12.63	12.63	14.19	13.25	13.53	13.25	13.84	13.25	13.34	13.25	2	6	6	5	5
196	1	1	2	87	1	1	1	4	6	5	1	29.19	28.4	28	28	25.72	24.47	24.59	24.47	20.1	22.69	24.28	20.1	24.44	26	22.82	22.82	1	3	3	3	2
205	1	1	1	52	1	1	1	7	9	1	2	7.44	6.88	7.1	6.88	7.03	7.13	7.4	7.03	6.94	6.94	6.38	6.38	7.13	7.34	6.75	6.75	2	11	11	10	11
212	1	1	1	73	1	1	1	4	9	3	1	24.72	32.28	28.47	24.72	25.78	23.31	25.19	23.31	22.85	24.66	25.5	22.85	25.22	25.19	31.96	25.19	1	5	6	6	6
214	1	1	1	78	3	2	1	4	9	3	2	9.97	10.31	9.78	9.78	9.93	9.88	9.81	9.81	10.13	9.84	9.12	9.12	9.25	8.47	8.91	8.47	1	9	7	8	8
206	1	1	1	80	1	1	1	17	9	5	2	26.22	29.09	29.82	26.22	28.21	24.57	25.65	24.57	28.19	27.69	26.91	26.91	30.47	28.34	25.72	25.72	1	7	4	8	5
221	1	1	1	67	1	2	1	5	9	5	1	14.22	13.75	13.5	13.5	13.21	13.28	13.68	13.21	13.6	12.97	13.5	12.97	14.28	14.65	14.56	14.28	2	11	12	14	12
188	1	1	2	70	1	1	1	17	9	5	1	23.97	29.56	24.97	23.97	25.18	26.82	23.6	23.6	24.43	24.62	26.85	24.43	25.78	25.07	25.87	25.07	2	4	6	5	5
218	1	1	1	70	1	3	1	10	9	1	2	23.82	21.97	23	21.97	23.12	22.5	23.28	22.5	17.65	19.69	20.91	17.65	16.5	14.87	16.66	16.5	2	4	4	5	5
200	1	1	2	90	2	2	2	10	9	1	1	15.6	14.12	15.44	14.12	15.28	15.88	15.47	15.28	13.91	13.87	14.22	13.87	15.28	17.35	13.69	13.69	2	7	7	7	7
226	1	1	1	51	1	2	1	6	9	1	2	7.44	7.82	7.56	7.44	8	7.28	6.72	6.72	7.16	7.35	7.46	7.16	6.6	6.69	6.69	6.6	2	12	12	13	14
229	1	1	1	83	1	1	1	5	6	1	1	10.75	10.28	9.62	9.62	9.87	9.62	9.75	9.62	9.62	10.29	10.03	9.62	10.57	11.44	11.03	10.57	1	8	5	6	6
230	1	1	1	72	1	3	1	3	6	1	2	12.16	12.16	11.19	11.19	12.19	12.19	11.1	11.1	12.56	11.88	10.88	10.88	11.72	12.75	12.44	11.72	2	7	6	7	8
232	1	1	2	66	1	1	1	4	6	5	1	30.37	27.81	28.81	27.81	27.78	27.55	27.44	27.44	25.66	25.59	25.66	25.59	27.19	26	27.4	26	1	4	5	7	5
246	1	1	1	69	1	1	1	7	9	5	2	16.9	18.71	20.28	16.9	20.96	19.22	20.13	19.22	18.53	19.13	17.81	17.81	16.1	18.66	17.56	16.1	2	8	7	8	9
256	1	1	1	86	1	1	2	3	9	1	1	10.87	9.38	9.79	9.38	11.47	9.53	9.44	9.44	9.47	9.88	10.85	9.47	10.04	9.53	8.97	8.97	2	10	11	10	10
258	1	1	2	75	2	1	1	7	9	5	2	21.88	19.88	19.28	19.28	21	22.32	21.97	21	22.79	20.09	21.84	20.09	22.25	19.72	18.57	18.57	2	6	6	6	6
264	1	1	1	74	1	2	1	2	9	1	1	7.59	7.54	7.94	7.54	6.71	6.37	6.19	6.19	6.32	6.41	5.97	5.97	6.91	6.31	6.4	6.31	2	10	10	13	11
261	1	1	1	90	1	3	2	4	9	5	2	25.44	23.53	25.59	23.53	28.78	27.84	26.68	26.68	24.18	22.63	23.66	22.63	23.53	26.22	22.56	22.56	1	4	3	4	4
265	2	1	1	62	1	2	1	38	6	5	1																	1	6	5	5	4
219	1	1	2	48	2	1	1	33	9	5	1	37.25	37.28	29.97	29.97	29.15	31	33.72	29.15	44.37	37.1	44.69	37.1	40.15	36.44	36.18	36.18	2	6	7	8	8
263	1	1	1	52	1	2	1	7	9	1	1	8.44	7.78	7.47	7.47	7.47	7.5	7.38	7.38	8.25	7.84	8.03	7.84	7.59	7.59	7.41	7.41	2	12	12	11	12
267	1	1	2	85	1	2	1	2	6	5	2	14.06	12.22	12.84	12.22	15.09	14.15	13.33	13.33	13.72	13.19	14.31	13.19	13.72	12.78	13.35	12.78	1	11	10	11	12
